# Supplementary material for: Promoting Social Connection and Deepening Relations Among Older Adults: Design and Qualitative Evaluation of Media Parcels
Source: PubMed Central journal article supplement (PMC6797971; doi:10.2196/14112), 2019-10-03
Supplement: jmir_v21i10e14112_app1.pdf [file jmir_v21i10e14112_app1.pdf]

## Relationship Semantic Differential Scale

MEDIA PARCELS: Facilitated media sharing to promote feelings of social connectedness in older adults

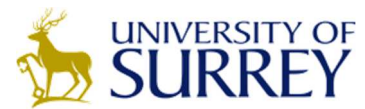

### Semantic Differential Scale

|                               |                              |                                |       |
|-------------------------------|------------------------------|--------------------------------|-------|
| Participant:                  |                              |                                | Date: |
| <input type="checkbox"/> PreT | <input type="checkbox"/> InT | <input type="checkbox"/> PostT |       |

I would like to ask you to rate your relationship with each one of your SSP in the following questionnaire. It consists of pairs of contrasting attributes that may apply to how you feel about the relationship. The circles between the attributes represent gradations between the opposites. You can express your agreement with the attributes by ticking the circle that most closely reflects your impression. Example:

|      |                       |                                  |                       |                       |                       |                       |                       |     |
|------|-----------------------|----------------------------------|-----------------------|-----------------------|-----------------------|-----------------------|-----------------------|-----|
| Good | <input type="radio"/> | <input checked="" type="radio"/> | <input type="radio"/> | <input type="radio"/> | <input type="radio"/> | <input type="radio"/> | <input type="radio"/> | Bad |
|------|-----------------------|----------------------------------|-----------------------|-----------------------|-----------------------|-----------------------|-----------------------|-----|

This response would mean that you rate the relationship as closer to Good than Bad.

Please decide spontaneously and don't think too long about your decision. Sometimes you may not be completely sure about your agreement with a particular attribute, nevertheless, please tick a circle in every line. It is your personal opinion that counts. Please remember: there is no wrong or right answer!

How would you describe your relationship with \_\_\_\_\_?

|                        |                       |                       |                       |                       |                       |                       |                       |                            |
|------------------------|-----------------------|-----------------------|-----------------------|-----------------------|-----------------------|-----------------------|-----------------------|----------------------------|
| Good                   | <input type="radio"/> | <input type="radio"/> | <input type="radio"/> | <input type="radio"/> | <input type="radio"/> | <input type="radio"/> | <input type="radio"/> | Bad                        |
| Close                  | <input type="radio"/> | <input type="radio"/> | <input type="radio"/> | <input type="radio"/> | <input type="radio"/> | <input type="radio"/> | <input type="radio"/> | Distant                    |
| Cold                   | <input type="radio"/> | <input type="radio"/> | <input type="radio"/> | <input type="radio"/> | <input type="radio"/> | <input type="radio"/> | <input type="radio"/> | Warm                       |
| Infrequent             | <input type="radio"/> | <input type="radio"/> | <input type="radio"/> | <input type="radio"/> | <input type="radio"/> | <input type="radio"/> | <input type="radio"/> | Frequent                   |
| Joyful                 | <input type="radio"/> | <input type="radio"/> | <input type="radio"/> | <input type="radio"/> | <input type="radio"/> | <input type="radio"/> | <input type="radio"/> | Gloomy                     |
| Unsupportive           | <input type="radio"/> | <input type="radio"/> | <input type="radio"/> | <input type="radio"/> | <input type="radio"/> | <input type="radio"/> | <input type="radio"/> | Supportive                 |
| Superficial            | <input type="radio"/> | <input type="radio"/> | <input type="radio"/> | <input type="radio"/> | <input type="radio"/> | <input type="radio"/> | <input type="radio"/> | Deep                       |
| Meaningless            | <input type="radio"/> | <input type="radio"/> | <input type="radio"/> | <input type="radio"/> | <input type="radio"/> | <input type="radio"/> | <input type="radio"/> | Meaningful                 |
| Connected              | <input type="radio"/> | <input type="radio"/> | <input type="radio"/> | <input type="radio"/> | <input type="radio"/> | <input type="radio"/> | <input type="radio"/> | Disconnected               |
| Thoughtful             | <input type="radio"/> | <input type="radio"/> | <input type="radio"/> | <input type="radio"/> | <input type="radio"/> | <input type="radio"/> | <input type="radio"/> | Thoughtless                |
| Two-sided              | <input type="radio"/> | <input type="radio"/> | <input type="radio"/> | <input type="radio"/> | <input type="radio"/> | <input type="radio"/> | <input type="radio"/> | One-sided                  |
| Boring                 | <input type="radio"/> | <input type="radio"/> | <input type="radio"/> | <input type="radio"/> | <input type="radio"/> | <input type="radio"/> | <input type="radio"/> | Exciting                   |
| Relaxed                | <input type="radio"/> | <input type="radio"/> | <input type="radio"/> | <input type="radio"/> | <input type="radio"/> | <input type="radio"/> | <input type="radio"/> | Tense                      |
| Passive                | <input type="radio"/> | <input type="radio"/> | <input type="radio"/> | <input type="radio"/> | <input type="radio"/> | <input type="radio"/> | <input type="radio"/> | Active                     |
| Unsatisfying           | <input type="radio"/> | <input type="radio"/> | <input type="radio"/> | <input type="radio"/> | <input type="radio"/> | <input type="radio"/> | <input type="radio"/> | Satisfying                 |
| Prone to communication | <input type="radio"/> | <input type="radio"/> | <input type="radio"/> | <input type="radio"/> | <input type="radio"/> | <input type="radio"/> | <input type="radio"/> | Not prone to communication |
